# Supplementary material for: Assessment of Mosquito Collection Methods for Dengue Surveillance
Source: Research Square preprint supplement (doi:10.21203/rs.3.rs-101828/v1), 2020-11-06
Supplement: Supplementary file 1 [file b9cb4d016f94ad72e4d590e9.xlsx]

## Sheet: Sheet1
	Province	District	Year	Species	Type of collection	Collection Method	Incidence per 100000	Number of pools	Number of mosquitoes	Number of positive pools								Sample type
										DENV-1	DENV-2	DENV-3	DENV-4	DENV-1 + DENV-2	DENV-1 + DENV-3	DENV-2 + DENV-3	DENV-1 + DENV-2 + DENV-3
	Aceh	East Aceh	2016	Aedes aegypti	Larva collection	Single larva method	37.93	67	1675	1	5	2	0	2	1	0	1	Larvae
	Aceh	East Aceh	2016	Aedes aegypti	Larva collection	Rearing	37.93	11	275	0	3	1	0	0	0	0	0	Adults
	Aceh	East Aceh	2016	Aedes albopictus	Larva collection	Rearing	37.93	2	50	0	0	0	0	0	0	0	0	Adults
	Aceh	East Aceh	2016	Aedes aegypti	Adult collection	Human landing	37.93	2	50	0	0	0	0	0	0	0	0	Adults
	Aceh	East Aceh	2016	Aedes albopictus	Adult collection	Human landing	37.93	10	500	0	0	0	0	0	0	0	0	Adults
	Aceh	West Aceh	2016	Aedes aegypti	Larva collection	Single larva method	33.85	56	1400	1	5	3	1	0	0	0	0	Larvae
	Aceh	West Aceh	2016	Aedes albopictus	Larva collection	Single larva method	33.85	31	775	3	2	1	0	0	0	0	0	Larvae
	Aceh	West Aceh	2016	Aedes aegypti	Adult collection	Human landing	33.85	1	25	0	0	0	0	0	0	0	0	Adults
	Aceh	West Aceh	2016	Aedes albopictus	Adult collection	Human landing	33.85	1	25	0	0	0	0	0	0	0	0	Adults
	Aceh	Pidie	2016	Aedes aegypti	Larva collection	Single larva method	44.37	52	1300	4	7	5	0	0	0	0	0	Larvae
	Aceh	Pidie	2016	Aedes albopictus	Larva collection	Single larva method	44.37	9	225	0	2	2	0	0	0	0	0	Larvae
	Aceh	Pidie	2016	Aedes albopictus	Larva collection	Single larva method	44.37	21	525	0	2	0	0	0	0	0	0	Larvae
	Aceh	Pidie	2016	Aedes aegypti	Larva collection	Rearing	44.37	3	75	0	2	0	0	1	0	0	0	Adults
	Aceh	Pidie	2016	Aedes aegypti	Adult collection	Human landing	44.37	4	100	0	0	0	0	0	0	0	0	Adults
	Aceh	Pidie	2016	Aedes albopictus	Adult collection	Human landing	44.37	5	125	0	0	0	0	0	0	0	0	Adults
	West Sumatra	South coast	2016	Aedes aegypti	Larva collection	Single larva method	62.58	79	1975	1	0	0	0	0	0	0	0	Larvae
	West Sumatra	South coast	2016	Aedes aegypti	Adult collection	Morning resting	62.58	3	75	0	0	0	0	0	0	0	0	Adults
	West Sumatra	South coast	2016	Aedes aegypti	Adult collection	Human landing	62.58	1	25	0	0	0	0	0	0	0	0	Adults
	West Sumatra	South coast	2016	Aedes aegypti	Larva collection	Rearing	62.58	1	25	0	0	0	0	0	0	0	0	Adults
	West Sumatra	South coast	2016	Aedes albopictus	Adult collection	Morning resting	62.58	3	75	0	0	0	0	0	0	0	0	Adults
	West Sumatra	South coast	2016	Aedes albopictus	Adult collection	Human landing	62.58	1	25	0	0	0	0	0	0	0	0	Adults
	West Sumatra	South coast	2016	Aedes albopictus	Larva collection	Single larva method	62.58	5	125	0	0	0	0	0	0	0	0	Larvae
	West Sumatra	Padang pariaman	2016	Aedes aegypti	Larva collection	Single larva method	46.74	19	475	0	1	0	0	0	0	0	0	Larvae
	West Sumatra	Padang pariaman	2016	Aedes albopictus	Larva collection	Single larva method	46.74	33	825	0	0	0	0	0	0	0	0	Larvae
	West Sumatra	West Pasaman	2016	Aedes aegypti	Larva collection	Single larva method	39.96	2	50	0	0	0	0	0	0	0	0	Larvae
	West Sumatra	West Pasaman	2016	Aedes albopictus	Larva collection	Single larva method	39.96	1	25	0	0	0	0	0	0	0	0	Larvae
	West Sumatra	West Pasaman	2016	Aedes aegypti	Larva collection	Rearing	39.96	1	25	0	0	1	0	0	0	0	0	Adults
	West Sumatra	West Pasaman	2016	Aedes aegypti	Adult collection	Human landing	39.96	1	25	0	0	0	0	1	0	0	0	Adults
	West Sumatra	West Pasaman	2016	Aedes albopictus	Adult collection	Morning resting	39.96	1	25	0	0	1	0	0	0	0	0	Adults
	Lampung	South Lampung	2016	Aedes aegypti	Larva collection	Single larva method	44.5	4	100	2	1	0	0	0	0	0	0	Larvae
	Lampung	South Lampung	2016	Aedes albopictus	Adult collection	Morning resting	44.5	1	25	0	0	0	0	0	0	0	0	Adults
	Lampung	South Lampung	2016	Aedes albopictus	Larva collection	Single larva method	44.5	15	375	0	2	0	0	0	0	0	0	Larvae
	Lampung	Tanggamus	2016	Aedes albopictus	Larva collection	Single larva method	66.34	8	200	0	0	0	0	0	0	0	0	Larvae
	Lampung	Tanggamus	2016	Aedes albopictus	Adult collection	Morning resting	66.34	1	25	0	0	0	0	0	0	0	0	Adults
	Lampung	Pesawaran	2016	Aedes aegypti	Larva collection	Single larva method	89.05	15	375	0	1	0	0	0	0	0	0	Larvae
	Bangka-belitung	Bangka	2016	Aedes albopictus	Adult collection	Human landing	21.70	1	25	0	0	0	0	0	0	0	0	Larvae
	Bangka-belitung	Bangka	2016	Aedes albopictus	Larva collection	Rearing	21.70	14	350	0	0	0	0	0	0	0	0	Adults
	Bangka-belitung	Bangka	2016	Aedes aegypti	Larva collection	Single larva method	21.70	40	1000	0	0	0	0	0	0	0	0	Larvae
	Bangka-belitung	Bangka	2016	Aedes aegypti	Larva collection	Rearing	21.70	21	525	0	3	0	0	0	0	0	0	Adults
	Bangka-belitung	Belitung	2016	Aedes albopictus	Larva collection	Rearing	103.40	2	50	0	0	0	0	0	0	0	0	Adults
	Bangka-belitung	Belitung	2016	Aedes aegypti	Larva collection	Rearing	103.40	6	150	0	0	0	0	0	0	0	0	Adults
	Bangka-belitung	Belitung	2016	Aedes albopictus	Larva collection	Rearing	103.40	6	150	0	0	0	0	0	0	0	0	Adults
	Bangka-belitung	Central Bangka	2016	Aedes aegypti	Larva collection	Rearing	35.20	22	550	0	0	0	0	0	0	0	0	Adults
	Bangka-belitung	Central Bangka	2016	Aedes aegypti	Larva collection	Single larva method	35.20	39	975	0	0	0	0	0	0	0	0	Larvae
	Bangka-belitung	Central Bangka	2016	Aedes albopictus	Larva collection	Rearing	35.20	3	75	0	0	0	0	0	0	0	0	Adults
	Bangka-belitung	Central Bangka	2016	Aedes albopictus	Larva collection	Single larva method	35.20	25	625	0	0	0	0	0	0	0	0	Larvae
	Bangka-belitung	Central Bangka	2016	Aedes albopictus	Adult collection	Morning resting	35.20	1	25	0	1	0	0	0	0	0	0	Adults
	West Kalimantan	Sambas	2016	Aedes aegypti	Larva collection	Single larva method	3.99	12	300	0	0	0	0	0	0	0	0	Larvae
	West Kalimantan	Sambas	2016	Aedes albopictus	Larva collection	Single larva method	3.99	4	100	0	0	0	0	0	0	0	0	Larvae
	West Kalimantan	Sambas	2016	Aedes aegypti	Adult collection	Human landing	3.99	1	25	0	1	0	0	0	0	0	0	Adults
	West Kalimantan	North Kayong	2016	Aedes aegypti	Larva collection	Single larva method	9.32	10	250	0	0	0	0	0	0	0	0	Larvae
	West Kalimantan	North Kayong	2016	Aedes albopictus	Larva collection	Single larva method	9.32	10	250	0	0	0	0	0	0	0	0	Larvae
	West Kalimantan	North Kayong	2016	Aedes aegypti	Larva collection	Rearing	9.32	1	25	0	1	0	0	0	0	0	0	Adults
	South Kalimantan	Tanah laut	2016	Aedes aegypti	Larva collection	Single larva method	120.56	65	1625	0	0	0	0	0	0	0	0	Larvae
	South Kalimantan	Tanah laut	2016	Aedes albopictus	Larva collection	Single larva method	120.56	14	350	0	0	0	0	0	0	0	0	Larvae
	South Kalimantan	Tanah laut	2016	Aedes albopictus	Adult collection	Morning resting	120.56	1	25	0	0	0	0	0	0	0	0	Adults
	South Kalimantan	Tanah laut	2016	Aedes aegypti	Adult collection	Morning resting	120.56	1	25	0	1	0	0	0	0	0	0	Adults
	South Kalimantan	Kota Baru	2016	Aedes aegypti	Larva collection	Single larva method	82.87	124	3100	0	0	0	0	0	0	0	0	Larvae
	South Kalimantan	Kota Baru	2016	Aedes albopictus	Larva collection	Single larva method	82.87	15	375	0	0	0	0	0	0	0	0	Larvae
	North Sulawesi	Minahasa	2016	Aedes albopictus	Larva collection	Single larva method	68.94	6	150	0	0	0	0	0	0	0	0	Larvae
	North Sulawesi	Minahasa	2016	Aedes aegypti	Larva collection	Single larva method	68.94	29	725	0	0	2	0	0	0	0	0	Larvae
	North Sulawesi	Manado	2016	Aedes aegypti	Larva collection	Single larva method	132.51	8	200	0	0	0	0	0	0	0	0	Larvae
	North Sulawesi	Manado	2016	Aedes albopictus	Larva collection	Single larva method	132.51	13	325	0	0	0	0	0	0	0	0	Larvae
	North Sulawesi	Manado	2016	Aedes albopictus	Adult collection	Human landing	132.51	2	50	0	0	0	0	0	0	0	0	Adults
	North Sulawesi	Manado	2016	Aedes aegypti	Adult collection	Human landing	132.51	1	25	0	0	0	0	0	0	0	0	Adults
	North Sulawesi	Manado	2016	Aedes albopictus	Larva collection	Rearing	132.51	8	200	0	0	0	0	0	0	0	0	Adults
	North Sulawesi	Manado	2016	Aedes aegypti	Larva collection	Rearing	132.51	2	50	0	0	0	0	0	0	0	0	Adults
	North Sulawesi	Bitung	2016	Aedes aegypti	Larva collection	Single larva method	57.89	3	75	0	0	0	0	0	0	0	0	Larvae
	East Java	Malang	2016	Aedes sp.	Larva collection	Single larva method	54.18	33	825	0	0	0	0	0	0	0	0	Larvae
	East Java	Malang	2016	Aedes sp.	Adult collection	Human landing	54.18	1	25	0	0	0	0	0	0	0	0	Adults
	East Java	Malang	2016	Aedes sp	Adult collection	Morning resting	54.18	1	25	0	0	0	0	0	0	0	0	Adults
	East Java	Malang	2016	Aedes albopictus	Adult collection	Animal baited trap	54.18	1	25	0	0	0	0	0	0	0	0	Adults
	East Java	Banyuwangi	2016	Aedes albopictus	Larva collection	Single larva method	20.81	1	25	1	0	0	0	0	0	0	0	Larvae
	East Java	Banyuwangi	2016	Aedes aegypti	Larva collection	Single larva method	20.81	1	25	1	0	0	0	0	0	0	0	Larvae
	East Java	Pasuruan	2016	Aedes aegypti	Larva collection	Rearing	165.67	6	150	1	0	0	0	4	0	0	0	Adults
	Southeast Sulawesi	Muna	2016	Aedes aegypti	Larva collection	Single larva method	90.70	78	1950	0	0	2	0	0	0	0	0	Larvae
	Southeast Sulawesi	Muna	2016	Aedes albopictus	Larva collection	Single larva method	90.70	10	250	0	0	0	0	0	0	0	0	Larvae
	Southeast Sulawesi	Muna	2016	Aedes aegypti	Adult collection	Human landing	90.70	8	200	0	0	0	0	0	0	0	0	Adults
	Southeast Sulawesi	Muna	2016	Aedes aegypti	Larva collection	Rearing	90.70	15	375	0	0	0	0	0	0	0	0	Adults
	Southeast Sulawesi	Bombana	2016	Aedes aegypti	Adult collection	Human Landing	49.30	1	25	0	0	0	0	0	0	0	0	Adults
	Maluku	Southeast Maluku	2016	Aedes aegypti	Larva collection	Single larva method	NA	133	3325	0	0	0	0	0	0	0	0	Larvae
	Maluku	Southeast Maluku	2016	Aedes albopictus	Larva collection	Single larva method	NA	12	300	0	0	0	0	0	0	0	0	Larvae
	Maluku	Southeast Maluku	2016	Aedes aegypti	Larva collection	Rearing	NA	3	75	1	2	0	0	0	0	0	0	Adults
	Maluku	Southeast Maluku	2016	Aedes aegypti	Adult collection	Morning resting	NA	1	25	1	0	0	0	0	0	0	0	Adults
	Maluku	Southeast west Maluku	2016	Aedes aegypti	Adult collection	Morning resting	NA	1	25	0	1	0	0	0	0	0	0	Adults
	Maluku	Southeast west Maluku	2016	Aedes aegypti	Adult collection	Human landing	NA	1	25	0	1	0	0	0	0	0	0	Adults
	Maluku	Aru islands	2016	Aedes aegypti	Larva collection	Rearing	NA	34	850	0	0	0	0	0	0	0	0	Adults
	Maluku	Aru islands	2016	Aedes albopictus	Larva collection	Rearing	NA	2	50	0	0	0	0	0	0	0	0	Adults
	West Nusa Tenggara	West Lombok	2016	Aedes sp.	Larva collection	Rearing	40.96	22	550	0	0	0	0	0	0	0	0	Adults
	West Nusa Tenggara	Bima	2016	Aedes aegypti	Larva collection	Single larva method	35.68	16	400	0	0	0	0	0	0	0	0	Larvae
	West Nusa Tenggara	North Lombok	2016	Aedes aegypti	Larva collection	Single larva method	108.86	19	475	0	0	0	0	0	0	0	0	Larvae
	North Maluku	South Halmahera	2016	Aedes albopictus	Larva collection	Single larva method	NA	28	700	0	0	0	0	0	0	0	0	Larvae
	North Maluku	South Halmahera	2016	Aedes aegypti	Adult collection	Human landing	NA	1	50	0	0	0	0	0	0	0	0	Adults
	North Maluku	South Halmahera	2016	Aedes aegypti	Larva collection	Rearing	NA	23	575	0	0	0	0	0	0	0	0	Adults
	North Maluku	South Halmahera	2016	Aedes aegypti	Larva collection	Single larva method	NA	42	1025	0	0	0	0	0	0	0	0	Larvae
	North Maluku	Morotai	2016	Aedes albopictus	Larva collection	Single larva method	NA	12	300	0	0	0	0	0	0	0	0	Larvae
	North Maluku	Morotai	2016	Aedes aegypti	Larva collection	Single larva method	NA	3	50	0	0	0	0	0	0	0	0	Larvae
	West Java	Garut	2016	Aedes aegypti	Larva collection	Single larva method	20.08	17	425	0	0	0	0	0	0	0	0	Larvae
	West Java	Garut	2016	Aedes albopictus	Larva collection	Single larva method	20.0817	1	25	0	0	0	0	0	0	0	0	Larvae
	West Java	Subang	2016	Aedes aegypti	Larva collection	Single larva method	45.21	9	225	0	0	0	0	0	0	0	0	Larvae
	West Java	Subang	2016	Aedes albopictus	Larva collection	Single larva method	45.2135	2	50	0	0	0	0	0	0	0	0	Larvae
	West Java	Pangandaran	2016	Aedes aegypti	Larva collection	Single larva method	36.4037	5	125	0	0	0	0	0	0	0	0	Larvae
	West Java	Pangandaran	2016	Aedes albopictus	Larva collection	Single larva method	36.4037	8	200	0	0	0	0	0	0	0	0	Larvae
	Banten	Pandeglang	2016	Aedes aegypti	Larva collection	Single larva method	75.1346	3	75	0	0	0	0	0	0	0	0	Larvae
	Banten	Pandeglang	2016	Aedes albopictus	Larva collection	Single larva method	75.1346	1	25	0	0	0	0	0	0	0	0	Larvae
	Banten	Lebak	2016	Aedes aegypti	Larva collection	Rearing	35.1001	4	100	0	0	0	0	0	0	0	0	Adults
	Banten	Lebak	2016	Aedes aegypti	Larva collection	Single larva method	35.1001	5	125	0	0	0	0	0	0	0	0	Larvae
	Banten	Lebak	2016	Aedes albopictus	Larva collection	Rearing	35.1001	26	650	0	0	0	0	0	0	0	0	Adults
	Banten	Lebak	2016	Aedes albopictus	Larva collection	Single larva method	35.1001	25	625	0	0	0	0	0	0	0	0	Larvae
	East Nusa Tenggara	Belu	2016	Aedes sp.	Larva collection	Single larva method	16.3	17	425	0	0	0	0	0	0	0	0	Larvae
	East Nusa Tenggara	Belu	2016	Aedes aegypti	Larva collection	Rearing	16.3	19	475	0	0	0	0	0	0	0	0	Adults
	East Nusa Tenggara	Ende	2016	Aedes aegypti	Larva collection	Single larva method	42.9	53	1325	0	0	0	0	0	0	0	0	Larvae
	East Nusa Tenggara	Ende	2016	Aedes aegypti	Larva collection	Rearing	42.9	1	25	0	0	0	0	0	0	0	0	Adults
	East Nusa Tenggara	Sumba	2016	Aedes aegypti	Larva collection	Single larva method	0	93	2325	0	0	0	0	0	0	0	0	Larvae
								1778	44675	17	44	20	1	8	1	0	1
